# Supplementary material
Source: publisher site journal article supplement (https://www.spandidos-publications.com/4518/downloadSupplementary)

Figure S1. Prediction of the targeting association between HIPK2 and rno-miR-146b-5p. HIPK1, homeodomain interacting protein kinase 2.

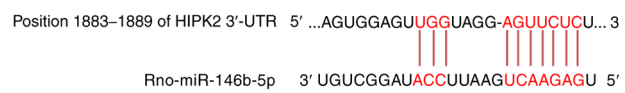

Supplement: Supplementary file 1 [file downloadSupplementary]
